# Supplementary material for: pH dependent supramolecular recognition of dapoxyl sodium sulfonate with 2-hydroxypropyl β-cyclodextrin: an application towards food-additive formulation
Source: Royal Society of Chemistry journal article supplement (doi:10.1039/c5nj03415a), 2016-01-01
Supplement: c5nj03415a1.pdf [file c5nj03415a1.pdf]

## ELECTRONIC SUPPORTING INFORMATION

### pH Dependent Supramolecular Recognition of Dapoxyl Sodium Sulfonate with 2-Hydroxypropyl $\beta$ -Cyclodextrin: An Application Towards Food-Additive Formulation

*Kaushik Pal, Falguni Chandra,<sup>‡</sup> Suman Mallick,<sup>‡</sup> Apurba L. Koner\**

Department of Chemistry, Indian Institute of Science Education and Research Bhopal, Bhopal, India. **Corresponding Author:** \* E-mail: [akoner@iiserb.ac.in](mailto:akoner@iiserb.ac.in), Fax: +91-755 6692 392; Tel: +91-755 6692 376. **Author information:** <sup>‡</sup>These authors contributed equally.

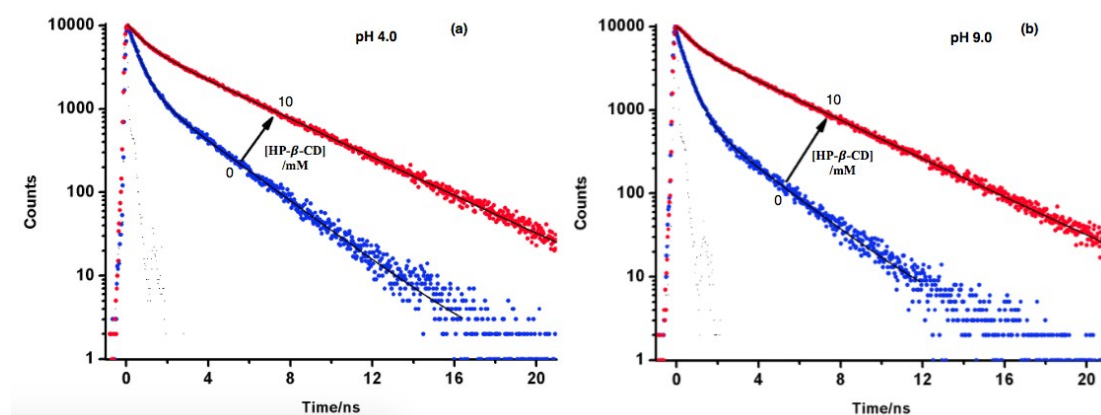

**Figure S1.** Effect of HP- $\beta$ -CD encapsulation on fluorescence lifetime decay of DSS at (a) pH 4.0, (b) pH 9.0. Increase in fluorescence lifetime upon complexation using 10 mM HP- $\beta$ -CD is shown by arrows.

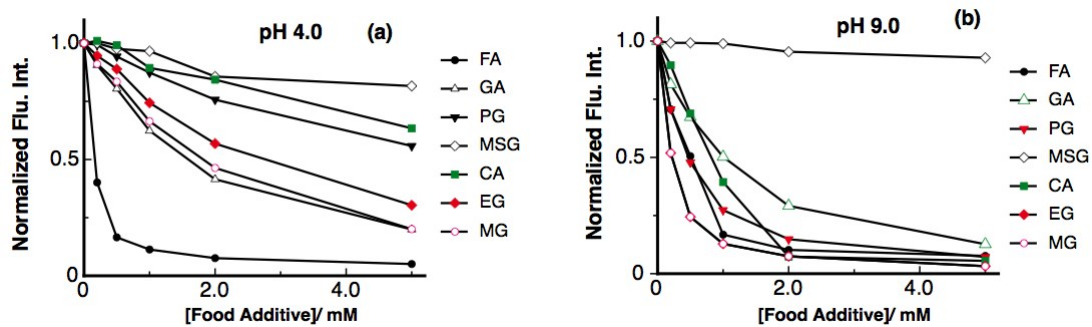

**Figure S2.** pH dependent displacement assay using food-additives. A change in fluorescence intensity of DSS monitored on addition of FA-*trans*-ferulic acid, GA-gallic acid, CA-*p*-coumaric acid, MSG-monosodium glutamate, PG-propyl gallate, EG-ethyl gallate and MG-methyl gallate ranging concentration from 0-5 mM at (a) pH 4.0, (b) pH 9.0.
